# Supplementary material
Source: publisher site journal article supplement (https://www.dovepress.com/article/398573)
Supplement: Supplementary file 1 [file get_supplementary_file.php]

**Supplementary figure**


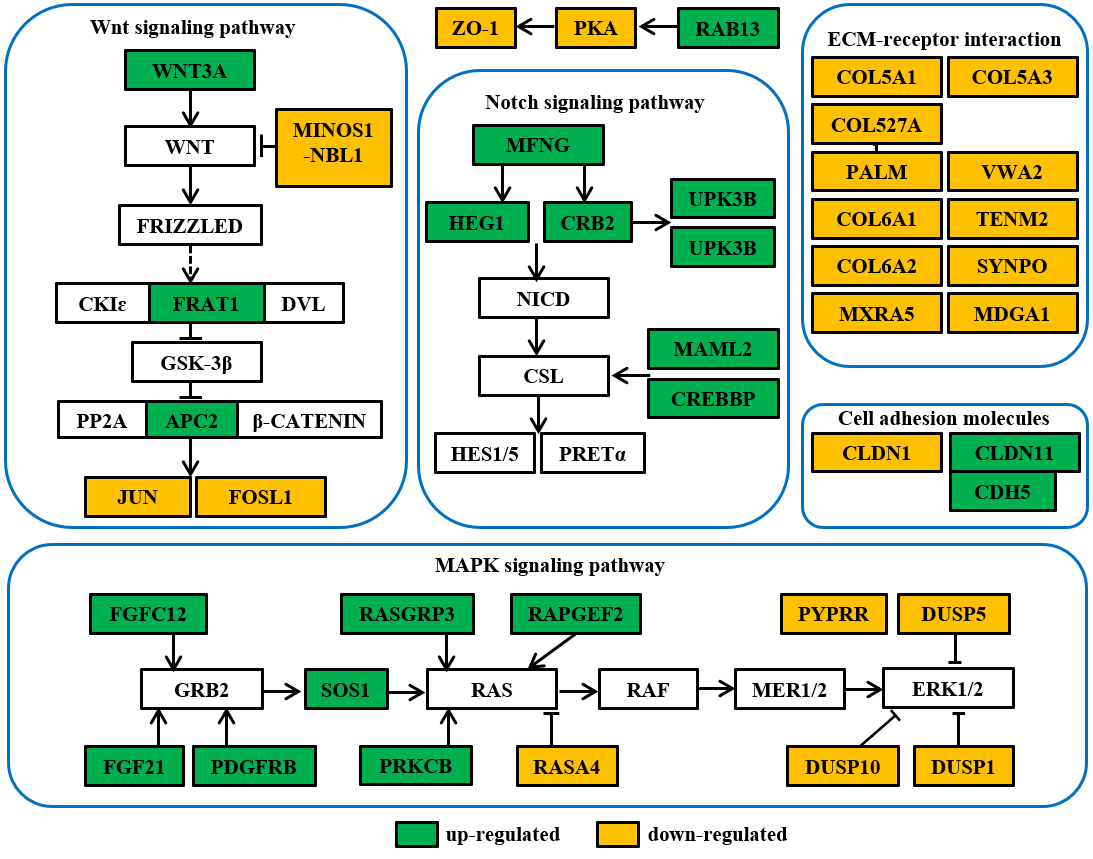


**Figure S1.** GSEA shows tumor related signaling pathways altered in *FAT1* knockdown HCC cells.
